# Supplementary material for: Thermal Release Transfer Printing for Stretchable Conformal Bioelectronics
Source: PubMed Central journal article supplement (PMC5700632; doi:10.1002/advs.201700251), 2017-07-31
Supplement: ADVS-4-na-s001.pdf [file ADVS-4-na-s001.pdf]

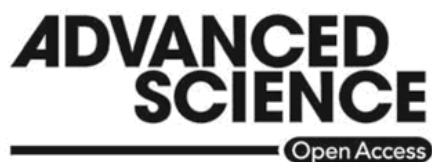

## Supporting Information

for *Adv. Sci.*, DOI: 10.1002/advs.201700251

### Thermal Release Transfer Printing for Stretchable Conformal Bioelectronics

*Zhuocheng Yan, Taisong Pan, Miaomiao Xue, Changyong Chen, Yan Cui, Guang Yao, Long Huang, Feiyi Liao, Wei Jing, Hulin Zhang, Min Gao, Daqing Guo, Yang Xia, and Yuan Lin\**

## Supporting Information

### **Thermal Release Transfer Printing for Stretchable Conformal Bioelectronics**

*Zhuocheng Yan, Taisong Pan, Miaomiao Xue, Changyong Chen, Yan Cui, Guang Yao, Long Huang, Feiyi Liao, Wei Jing, Hulin Zhang, Min Gao, Daqing Guo, Yang Xia, Yuan Lin\**

**The bending stiffness of the thin film**

The cross sectional geometry of the thin film on a PDMS backing substrate is illustrated in Figure S7. The PDMS backing substrate has a thickness  $H$  and Young's modulus  $E_{PDMS} = 841$  kPa. The distance between the neutral axis and bottom of the thin film is<sup>[1]</sup>:

$$y_0 = \frac{h}{2} \frac{1 + \frac{2h_2 + h_3}{h} \left( \frac{E_{Au}}{E_{PI}} - 1 \right) \frac{nb_3 h_3}{bh} - \frac{E_{PDMS} H^2}{E_{PI} h^2}}{1 + \left( \frac{E_{Au}}{E_{PI}} - 1 \right) \frac{nb_3 h_3}{bh} + \frac{E_{PDMS} H}{E_{PI} h}} \quad (S1)$$

The bending stiffness of the thin film is

$$EI = E_{PI} bh \left( \frac{1}{3} h^2 - h y_0 + y_0^2 \right) + E_{PDMS} b H \left( \frac{1}{3} H^2 + H y_0 + y_0^2 \right) + (E_{Au} - E_{PI}) nb_3 h_3 \left[ \frac{1}{3} h_3^2 + h_3 (h_2 - y_0) + (h_2 - y_0)^2 \right] \quad (S2)$$

For the wrapped state to be energetically favorable,

$$\gamma \geq \gamma_c = \frac{EI}{R^2 b} \quad (S3)$$

where  $\gamma$  is the adhesion energy per unit area. The bottom frame of Figure S7 compares the above relation with a series of experiments. The data, whose error range is  $\pm 5\%$ , are consistent with  $\gamma \sim 10$  mJ m<sup>-2</sup>, which is comparable to reported values for wet interfaces.

### The calculation of RMS amplitude and correlation coefficient

The calculation of RMS amplitude can be developed by

$$x_{rms} = \sqrt{\frac{\sum_{i=1}^N x_i^2}{N}} = \sqrt{\frac{x_1^2 + x_2^2 + \dots + x_N^2}{N}} \quad (S4)$$

Where  $x_{rms}$  is RMS amplitude of  $x$  sequence,  $x$  is a time-related sequence,  $x_i$  is the  $i$  th element in  $x$  sequence,  $N$  is sequence length.

The calculation of correlation coefficient can be developed by

$$r = \frac{\sum_{i=1}^N (x_i - \bar{x})(y_i - \bar{y})}{\sqrt{\sum_{i=1}^N (x_i - \bar{x})^2 \cdot \sum_{i=1}^N (y_i - \bar{y})^2}} \quad (S5)$$

Where  $r$  is the correlation coefficient of two sequences,  $x$  is a time-related sequence,  $y$  is another time-related sequence,  $x_i$  is the  $i$  th element in  $x$  sequence,  $y_i$  is the  $i$  th element in  $y$  sequence,  $N$  is sequence length,  $\bar{x}$  is average value of  $x$  sequence,  $\bar{y}$  is average value of  $y$  sequence.

### The calculation of SSVEP SNR

In order to compare the SNRs of the ECoG signals of stretchable neural electrode array and stainless-steel screw electrodes, the SNR of SSVEP signals is defined as

$$SNR = \frac{n \cdot X(f_{stimulus})}{\sum_{f=f_1}^{f_2} X(f)} \quad (S6)$$

Where  $X(f)$  is the amplitude spectrum ranged from  $f_1=7$  Hz to  $f_2=9$  Hz calculated by FFT,  $f_{stimulus}=8$  Hz, and  $n$  is number of points of  $X(f)$  from  $f_1$  to  $f_2$ .

**Table S1.** Comparison of ECoG rms amplitude of the 467- $\mu$ m-thick PDMS stretchable neural electrode array and the rigid electrodes

| Ch  | 1      | 2      | 3      | 4      | 5      | 6      | 7     | 8      | 9      | 10     | 11     | 12    | 13     |
|-----|--------|--------|--------|--------|--------|--------|-------|--------|--------|--------|--------|-------|--------|
| RMS | 0.2159 | 0.2188 | 0.2205 | 0.2253 | 0.2293 | 0.2295 | 0.227 | 0.2828 | 0.2021 | 0.0764 | 0.0515 | 0.067 | 0.0464 |

**Table S2.** Comparison of ECoG correlation coefficient of the 467- $\mu$ m-thick PDMS stretchable neural electrode array and the rigid electrodes

| Ch | 1      | 2      | 3      | 4      | 5      | 6      | 7      | 8      | 9      |
|----|--------|--------|--------|--------|--------|--------|--------|--------|--------|
| 10 | 0.2376 | 0.2403 | 0.2286 | 0.2223 | 0.2173 | 0.1391 | 0.2017 | 0.1542 | 0.2401 |
| 11 | 0.1677 | 0.1707 | 0.1626 | 0.1574 | 0.1526 | 0.1476 | 0.1391 | 0.1017 | 0.1654 |
| 12 | 0.1435 | 0.1467 | 0.1374 | 0.1337 | 0.1303 | 0.1249 | 0.118  | 0.0888 | 0.1457 |
| 13 | 0.0959 | 0.1004 | 0.0946 | 0.0923 | 0.0899 | 0.0864 | 0.0793 | 0.0594 | 0.0934 |

**Table S3.** Comparison of ECoG rms amplitude of the 50- $\mu$ m-thick PDMS stretchable neural electrode array and the rigid electrodes

| Ch  | 1      | 2      | 3      | 4      | 5      | 6      | 7      | 8      | 9      | 10     | 11     | 12     | 13     |
|-----|--------|--------|--------|--------|--------|--------|--------|--------|--------|--------|--------|--------|--------|
| RMS | 0.1143 | 0.1132 | 0.1016 | 0.1076 | 0.1051 | 0.0941 | 0.0917 | 0.0913 | 0.0943 | 0.0893 | 0.0670 | 0.0896 | 0.0759 |

**Table S4.** Comparison of ECoG correlation coefficient of the 50- $\mu$ m-thick PDMS stretchable neural electrode array and the rigid electrodes

| Ch | 1      | 2      | 3      | 4      | 5      | 6      | 7      | 8      | 9      |
|----|--------|--------|--------|--------|--------|--------|--------|--------|--------|
| 10 | 0.8553 | 0.8971 | 0.8703 | 0.8828 | 0.9126 | 0.8843 | 0.8863 | 0.9017 | 0.8761 |
| 11 | 0.7967 | 0.8144 | 0.8096 | 0.8012 | 0.8098 | 0.8138 | 0.798  | 0.8056 | 0.7804 |
| 12 | 0.8094 | 0.859  | 0.8366 | 0.8562 | 0.8947 | 0.8767 | 0.8917 | 0.9072 | 0.8918 |
| 13 | 0.8194 | 0.8359 | 0.8378 | 0.8341 | 0.8341 | 0.866  | 0.8545 | 0.8482 | 0.8342 |

\* The stretchable neural electrode array is with nine channels (Ch 1~9) and the stainless-steel screw electrodes are four channels (Ch 10~13). The maximum and minimum of correlation coefficients are marked in grey.

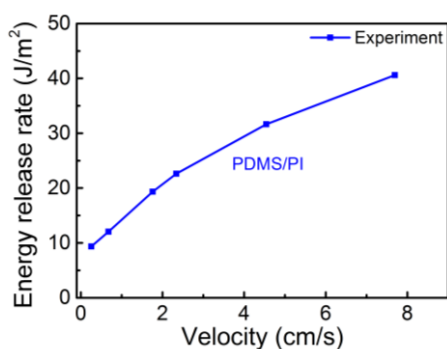

**Figure S1.** Critical energy release rate versus peel velocity for the PDMS stamp/PI/PMMA/glass substrate.

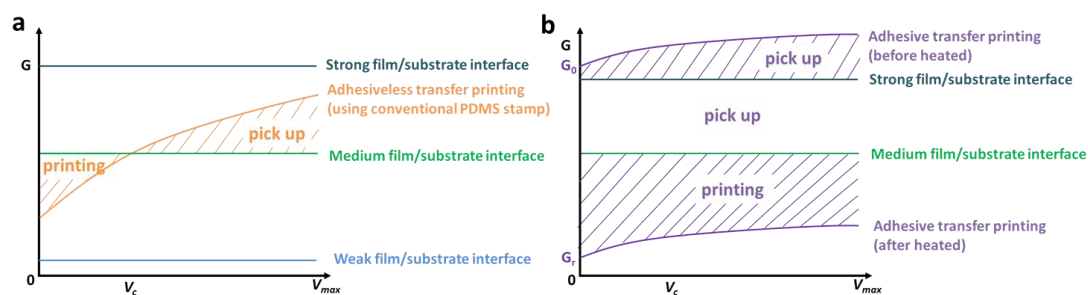

**Figure S2.** Schematic diagram of critical energy release rates for the film/substrate interface and for the stamp/film interface. a) Conventional PDMS transfer printing method. b) Thermal release transfer printing method.

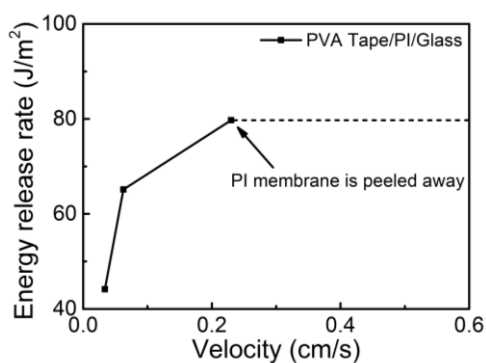

**Figure S3.** PVA Tape used to test the energy release rate of PI/Glass interface.

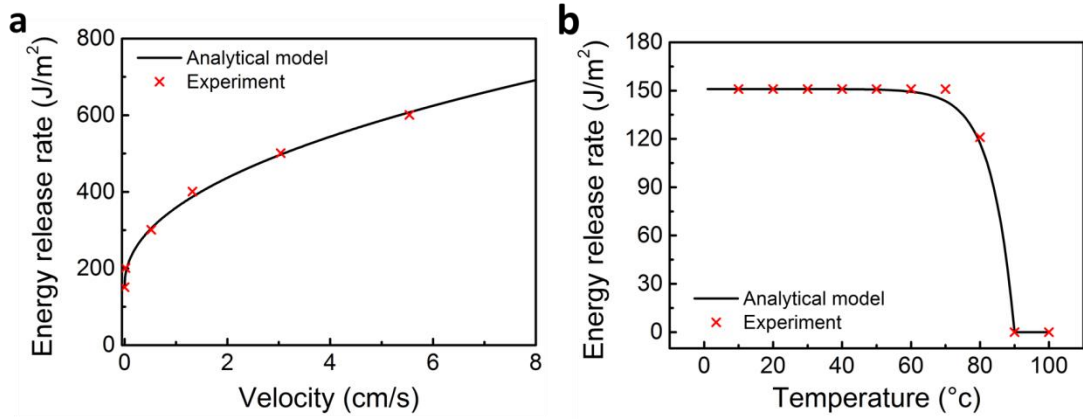

**Figure S4.** a) Experimental data and theoretical analysis' results of the relationship between the energy release rate and velocity (TRT, PET/PMMA/glass structures). b) Experimental data and theoretical analysis' results of the relationship between the energy release rate and temperature (TRT, PET/PMMA/glass substrate).

The  $G_{TRT/PET}$  can also be considered to be determined by two parameters, temperature and peeling velocity. Then, Equation 3 can be further developed as:

$$G_{TRT/PET}(v, T) = \begin{cases} \left( -e^{0.15(T-90)+\ln(151-\frac{1}{\infty})+151} + 151 \right) \left( 1 + \left( \frac{v}{0.5} \right)^{0.46} \right) & T \leq 90 \\ \frac{1}{\infty} \left( 1 + \left( \frac{v}{0.5} \right)^{0.46} \right) & T > 90 \end{cases} \quad (S7)$$

Where the  $v$  is current peeling velocity (unit: cm/s),  $T$  is current temperature (unit: degree Celsius),  $e$  is Euler's constant,  $G_{TRT/PET}$  is energy release rate of TRT and PET (unit: J/m<sup>2</sup>).

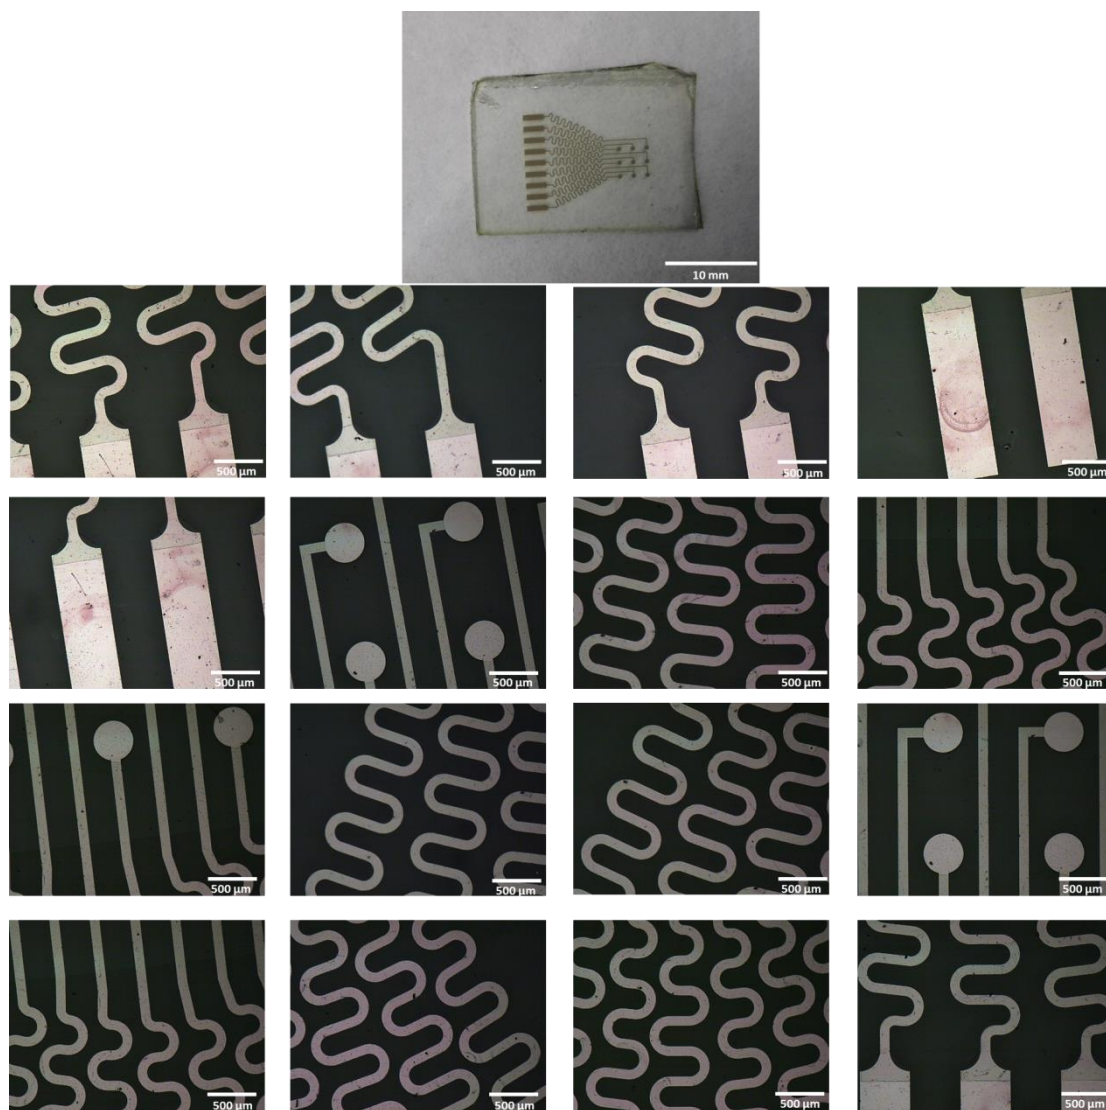

**Figure S5.** Detailed optical images of the as-fabricated transferable electrode array on a glass substrate (PI/Au/PI/glass).



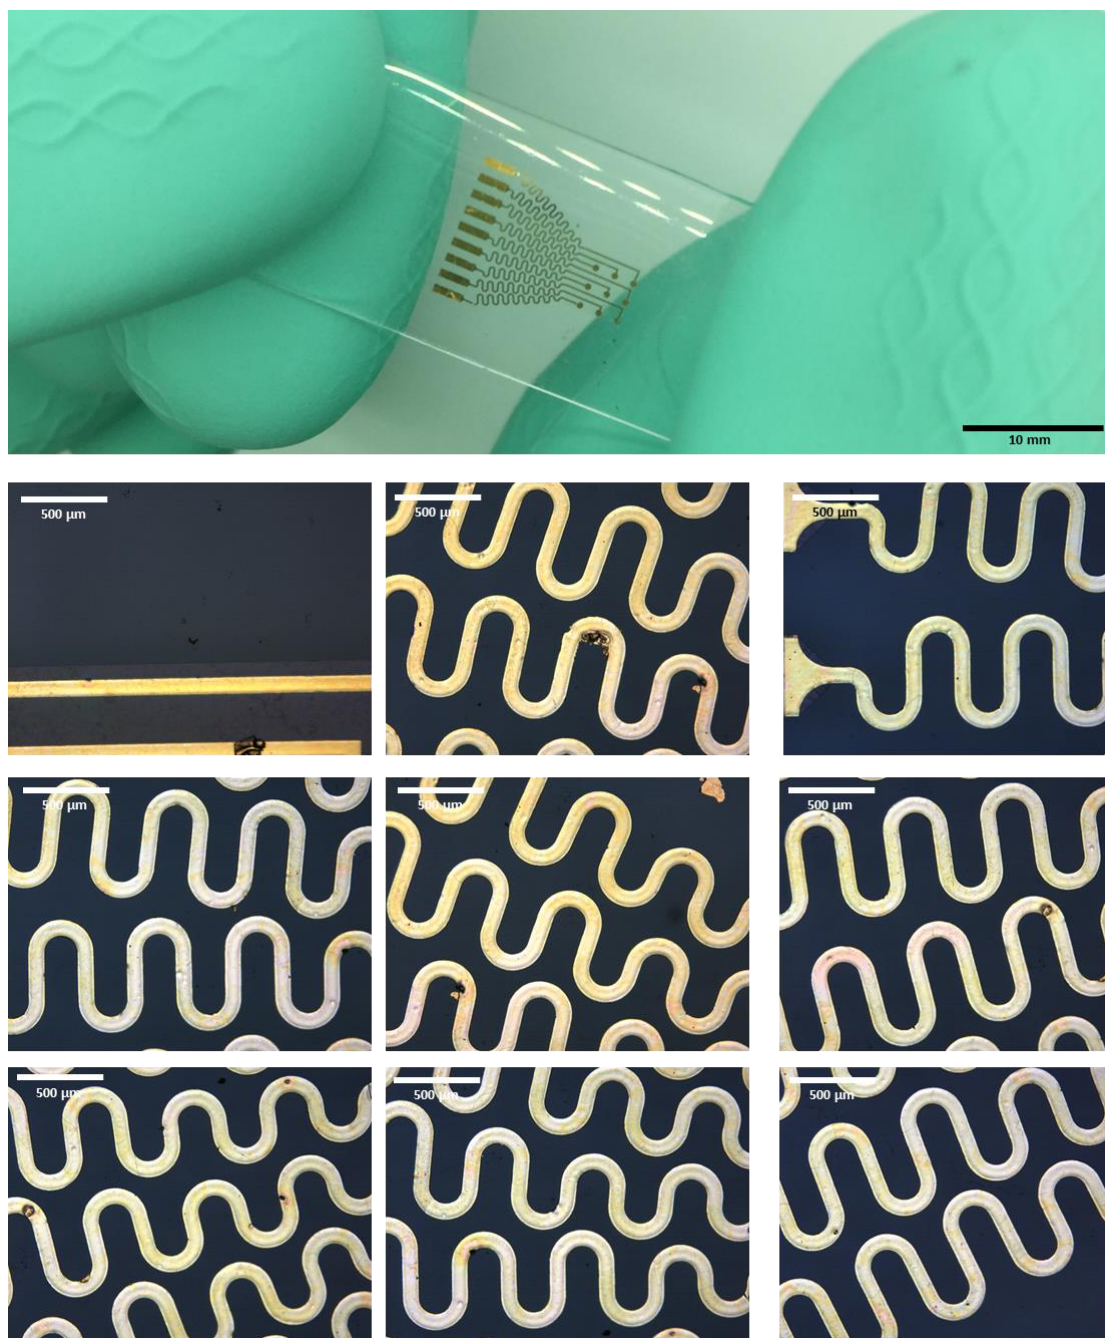

**Figure S6** Detailed optical images of the transfer-printed stretchable conformal neural electrode array on a PDMS (50- $\mu\text{m}$ -thick, 841 kPa) substrate.

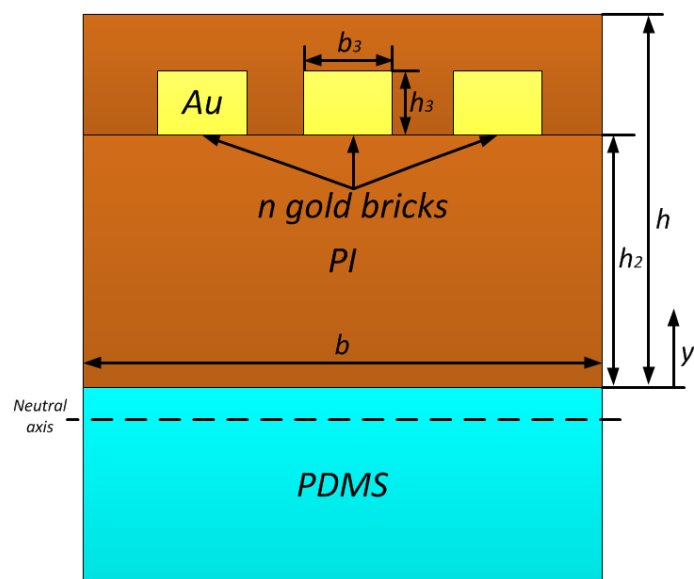

**Figure S7.** Schematic diagram for analytical model for bending stiffness. Cross section of the stretchable conformal neural electrode array on a PDMS backing substrate, with geometrical parameters illustrated.

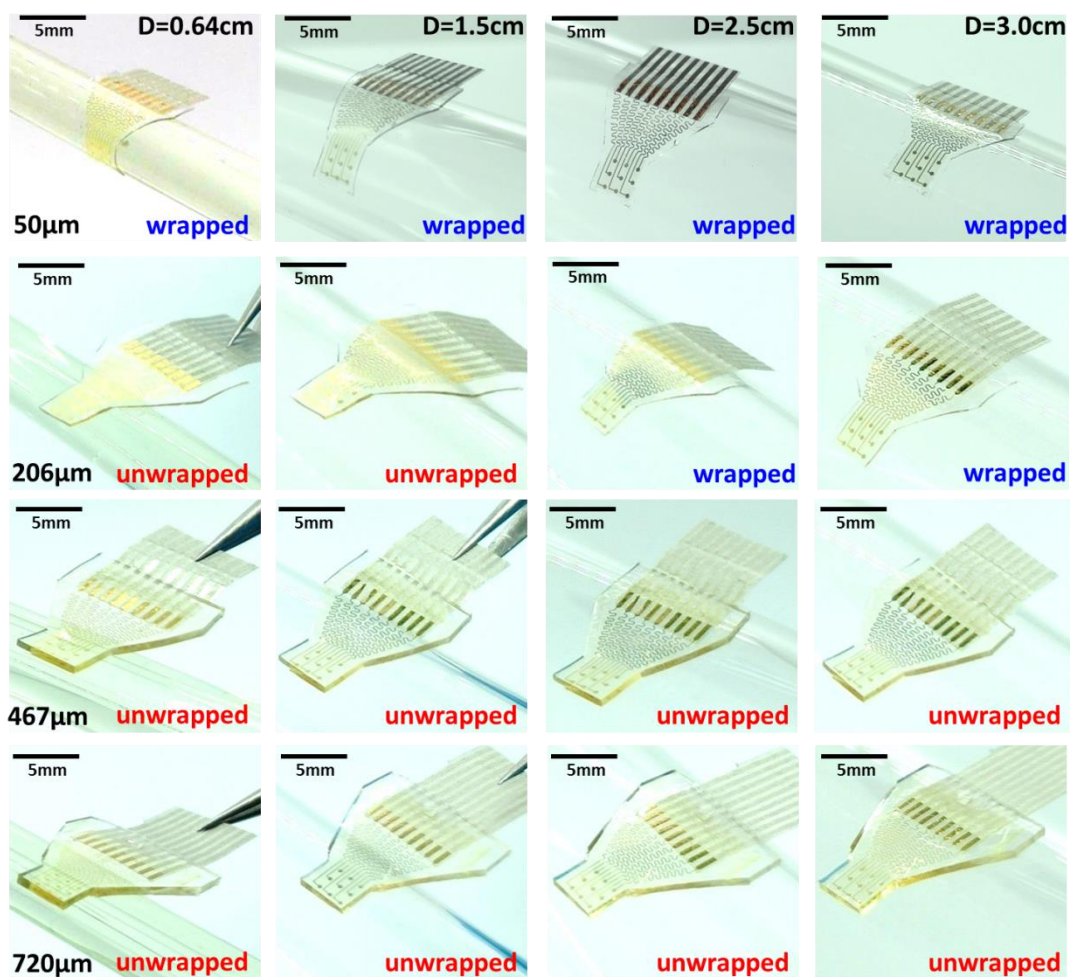

**Figure S8.** Wrapping experiments on cylinders (whose diameters are 0.64 cm, 1.5 cm, 2.5 cm and 3.0 cm, respectively) using the as-prepared electrode arrays with back elastomeric substrates of different thicknesses (50  $\mu\text{m}$ , 216  $\mu\text{m}$ , 467  $\mu\text{m}$  and 720  $\mu\text{m}$ ).

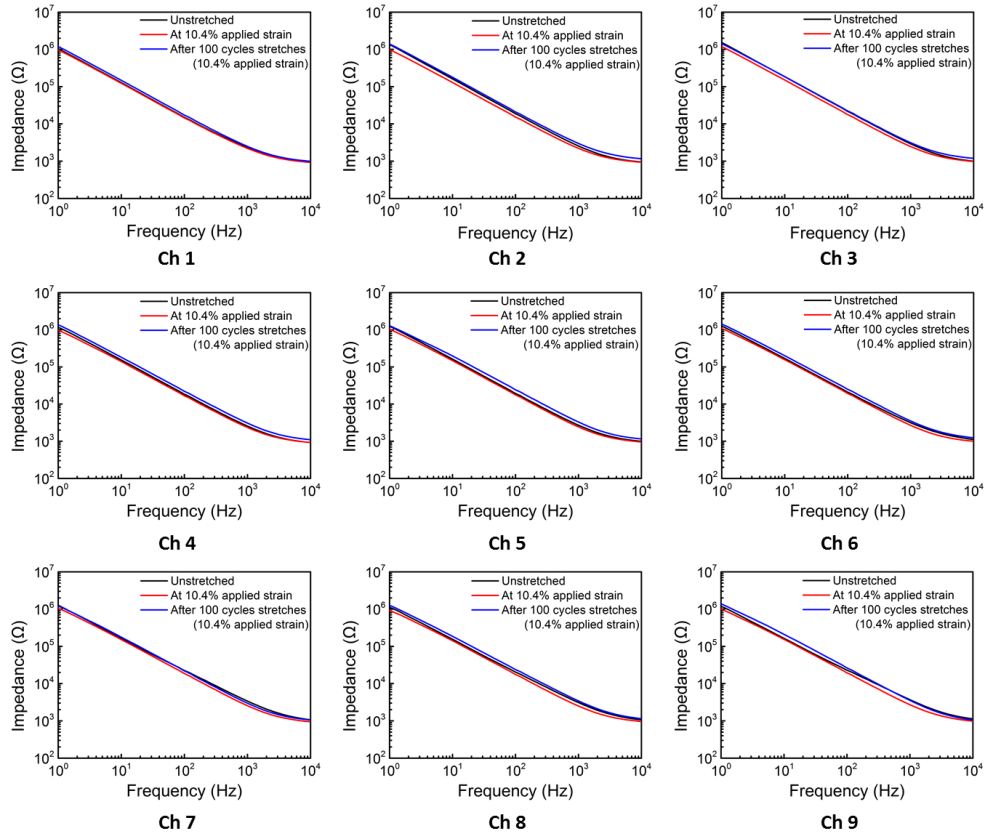

**Figure S9.** Electrochemical impedance spectra: magnitude measured at nine different recording sites in the stretchable neural electrode array under unstretched, 10.4% applied strain and after 100 cycles of stretches (10.4% applied strain).

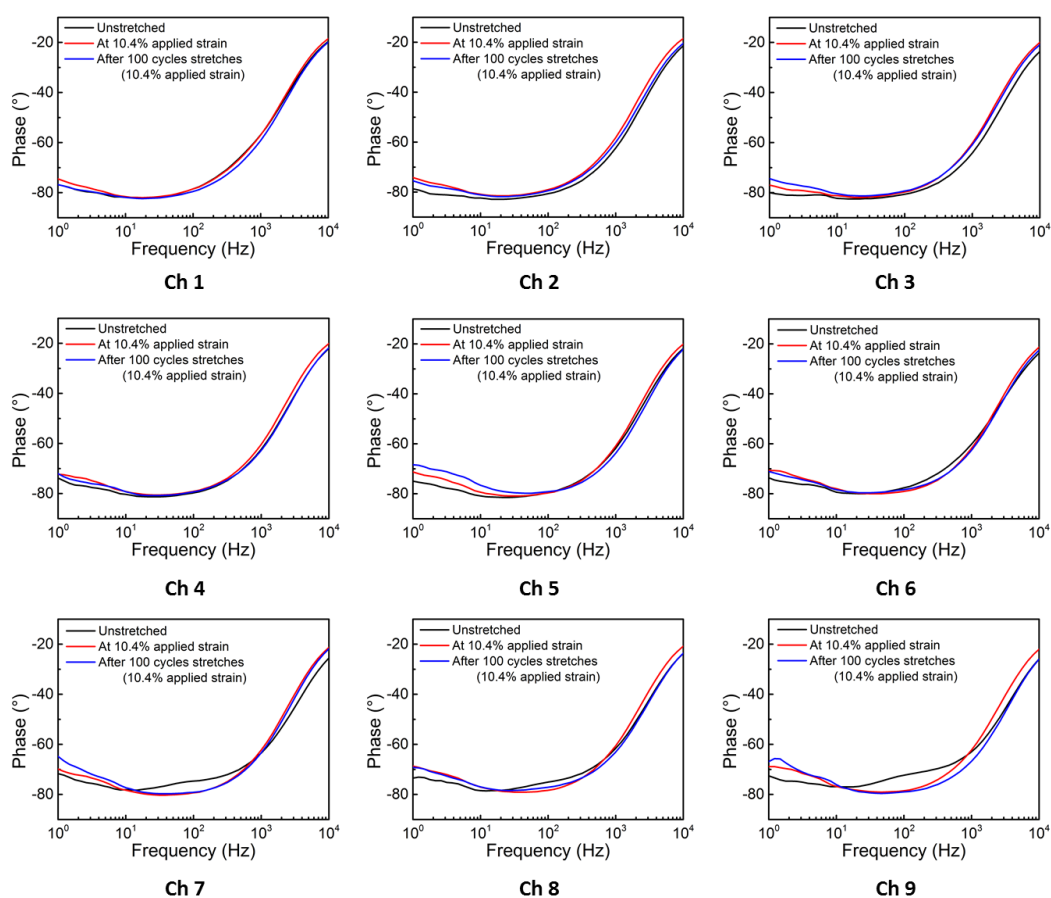

**Figure S10.** Electrochemical impedance spectra: phase measured at nine different recording sites in the stretchable neural electrode array under unstretched, 10.4% applied strain and after 100 cycles of stretches (10.4% applied strain).

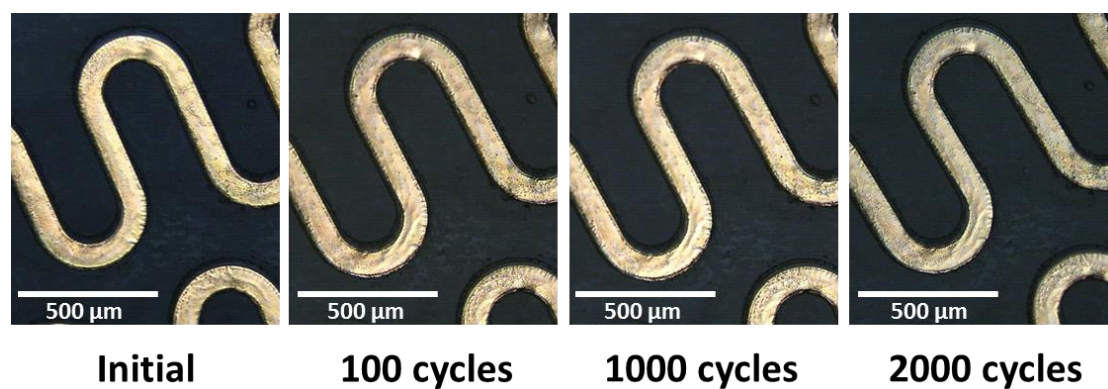

**Figure S11.** Microscopic images showing cyclic testing results.

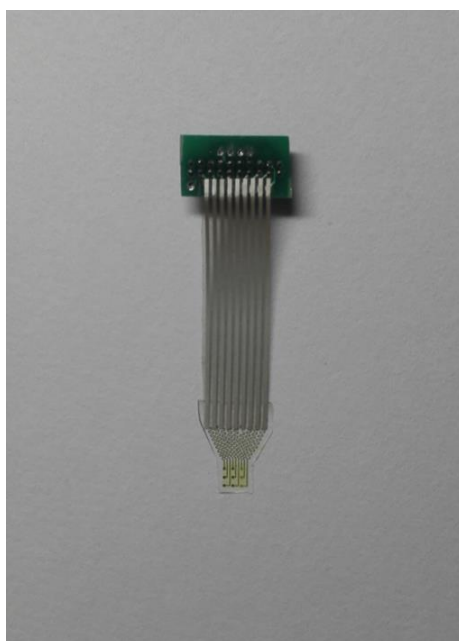

**Figure S12.** Images of the electrode array after connection of HSC and the printed circuit board.

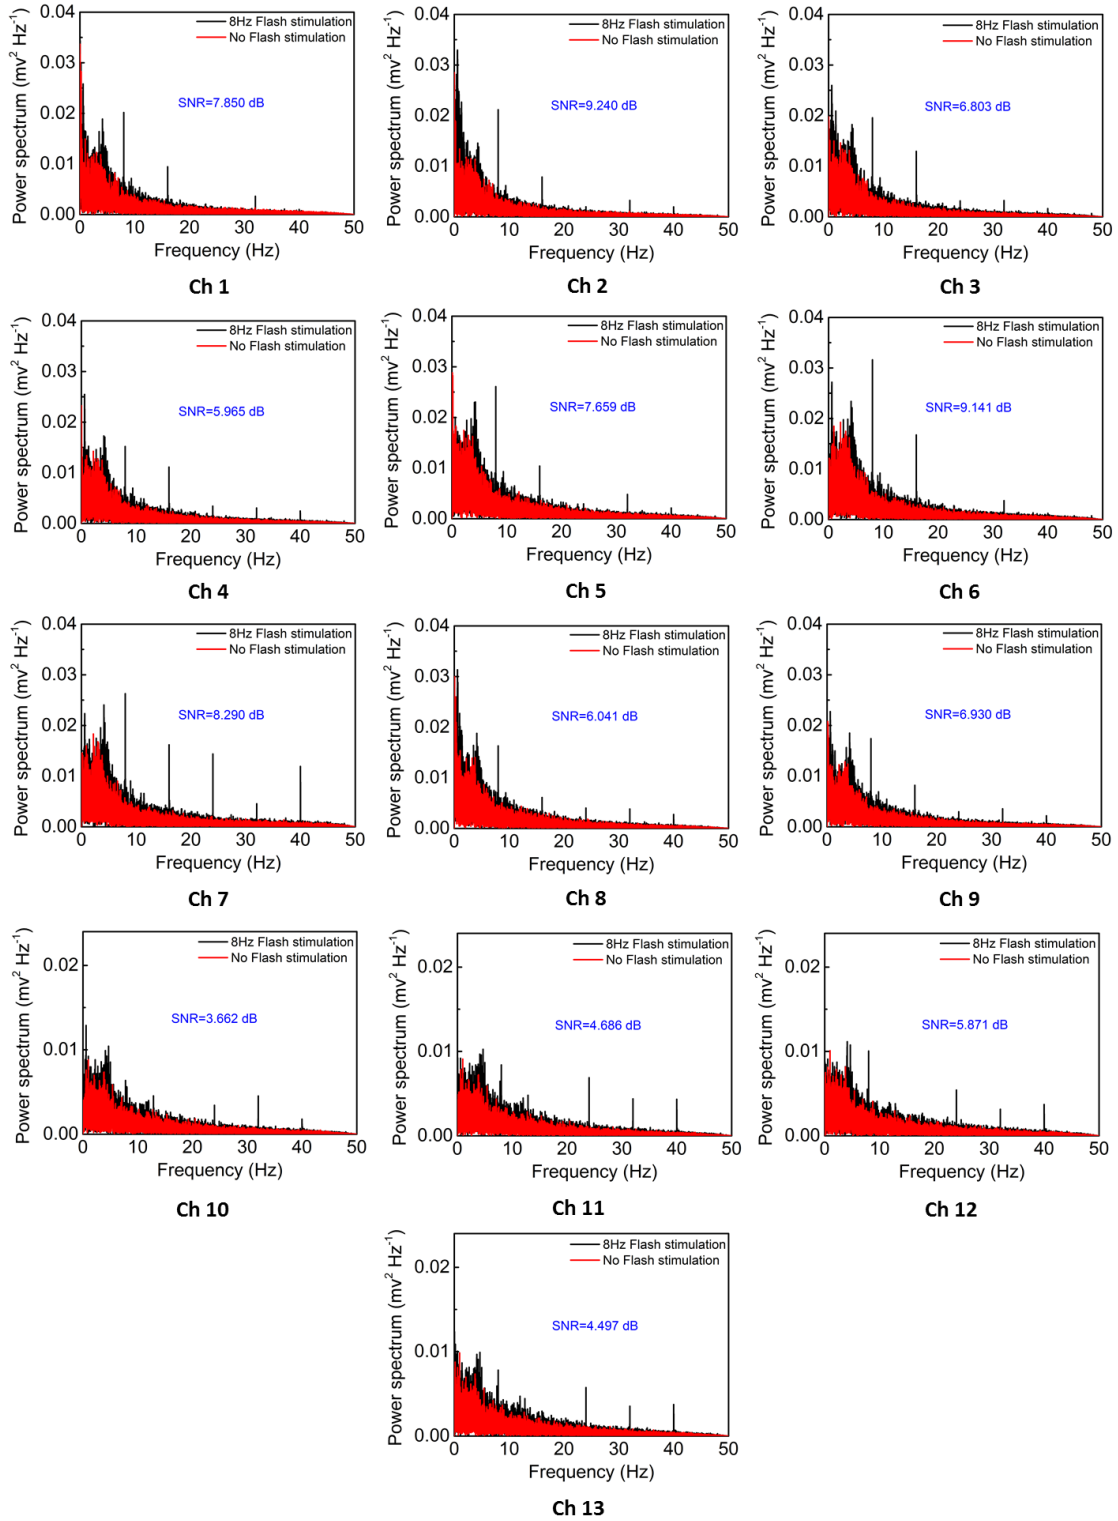

**Figure S13.** Power density spectra of the SSVEP recorded by 3 min time windows for the 50- $\mu\text{m}$ - thick PDMS stretchable neural electrode array (Ch 1~9) and the stainless-steel screw neural electrodes of (Ch 10~13).

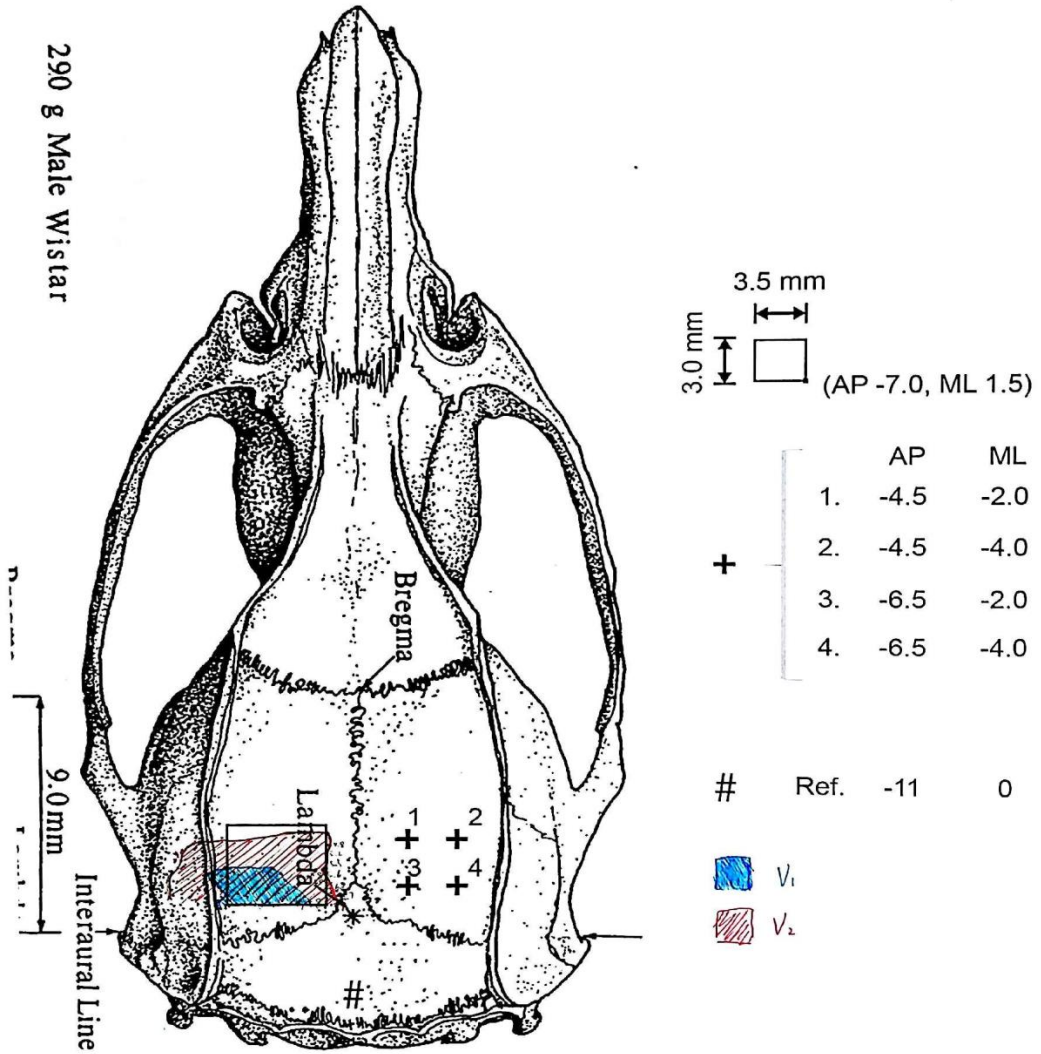

Figure S14. The precise locations of 13-electrode montage<sup>[2]</sup>.



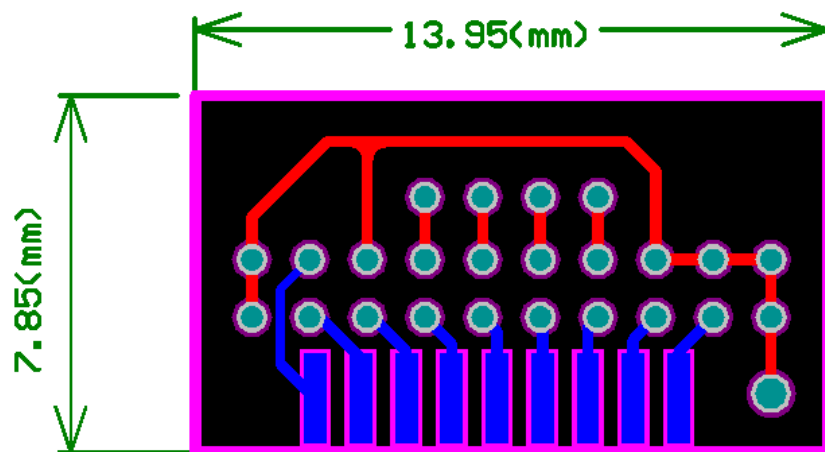

**Figure S15.** The architecture drawing of the PCB used in the experiments.

#### References for Supporting Information

- [1] D. H. Kim, J. Viventi, J. J. Amsden, J. Xiao, L. Vigeland, Y. S. Kim, J. A. Blanco, B. Panilaitis, E. S. Frechette, D. Contreras, D. L. Kaplan, F. G. Omenetto, Y. Huang, K. C. Hwang, M. R. Zakin, B. Litt, J. A. Rogers, *Nat. Mater.* **2010**, 9, 511.
- [2] G. Paxinos, C. Watson, *The rat brain in stereotaxic coordinates*, Boston: Elsevier Academic Press, **2005**
